# Supplementary material for: The effect of gme topology on multicomponent adsorption in zeolitic imidazolate frameworks
Source: Royal Society of Chemistry journal article supplement (doi:10.1039/c6cp06036f), 2016-11-29
Supplement: c6cp06036f1.pdf [file c6cp06036f1.pdf]

# The effect of GME topology on the multicomponent adsorption in ZIFs

Anastasios Gotzias\*

*NCSR Demokritos*

E-mail: a.gotzias@inn.demokritos.gr

Phone: +30 (0)210 6503408. Fax: +30 (0)210 6503408

## Supporting Information

Table 1: atom atom interaction parameters

| ZIF atoms |                    |                      | adsorbate atoms  |                    |                      |                               |
|-----------|--------------------|----------------------|------------------|--------------------|----------------------|-------------------------------|
| atom      | $\sigma(\text{Å})$ | $\varepsilon/k_B(K)$ | atom             | $\sigma(\text{Å})$ | $\varepsilon/k_B(K)$ | q(e)                          |
| Carbon    | 3.43               | 40.27                | Carbon $CO_2^a$  | 2.76               | 28.13                | 0.576                         |
| Oxygen    | 3.12               | 21.75                | Oxygen $CO_2^a$  | 3.03               | 80.51                | -0.288                        |
| Hydrogen  | 2.57               | 14.14                | Nitrogen $N_2^b$ | 3.31               | 36.00                | -0.482 (0.964) <sup>com</sup> |
| Nitrogen  | 3.26               | 22.72                | Oxygen $O_2^c$   | 3.01               | 49.05                | -0.123 (0.246) <sup>com</sup> |
| Zinc      | 2.46               | 53.4                 | $CH_4$           | 3.73               | 148.00               |                               |
| Cl        | 3.52               | 99.23                | $O(H_2O)^d$      | 3.15               | 76.58                | -0.834 (0.417) <sup>H</sup>   |
| Br        | 3.73               | 126.31               |                  |                    |                      |                               |

<sup>a</sup> C-O distance (Å) :1.18; <sup>b</sup> N-N distance (Å) :1.1; <sup>c</sup> O-O distance (Å) :1.21;

<sup>d</sup> O-H distance (Å) :0.9572, H-O-H angle 104.52°; <sup>com</sup> center of mass charge;

<sup>H</sup> hydrogen atom charge;

\*To whom correspondence should be addressed

Table 2: Atomic charges ( $e$ ) on  $Im - Zn - nIm$  fragments for ZIFs 68-78

| ZIF68                                                                             |             | ZIF69                                                                             |            | ZIF70                                                                             |              | ZIF78                                                                               |            |
|-----------------------------------------------------------------------------------|-------------|-----------------------------------------------------------------------------------|------------|-----------------------------------------------------------------------------------|--------------|-------------------------------------------------------------------------------------|------------|
|  |             |  |            |  |              |  |            |
| C1                                                                                | 0.225591    | Zn1                                                                               | 0.7317525  | C1                                                                                | 0.605978456  | C1                                                                                  | -0.0106    |
| C2                                                                                | 0.350384    | O11                                                                               | -0.478251  | C2                                                                                | 0.001007456  | C2                                                                                  | 0.128964   |
| C3                                                                                | 0.179233    | N2                                                                                | -0.1558705 | C3                                                                                | 0.013118456  | C3                                                                                  | 0.001442   |
| C4                                                                                | 0.174222    | N8                                                                                | -0.3714605 | C4                                                                                | -0.056530044 | C4                                                                                  | -0.219686  |
| C6                                                                                | -0.1565715  | N98                                                                               | 0.731731   | H1                                                                                | 0.111105956  | C5                                                                                  | -0.121936  |
| C8                                                                                | -0.143245   | C6                                                                                | 0.061975   | H2                                                                                | 0.046464456  | C6                                                                                  | 0.043451   |
| H1                                                                                | -0.015756   | C4                                                                                | -0.074958  | H3                                                                                | 0.073645456  | C7                                                                                  | -0.015263  |
| H4                                                                                | 0.013269625 | C3                                                                                | 0.092504   | N1                                                                                | 0.497581456  | C8                                                                                  | 0.258017   |
| H6                                                                                | 0.0190095   | C13                                                                               | 0.092504   | N2                                                                                | -0.604204044 | C9                                                                                  | -0.021719  |
| H8                                                                                | 0.128247    | C89                                                                               | 0.350589   | N3                                                                                | -0.201820044 | H1                                                                                  | 0.1944375  |
| N1                                                                                | -0.284354   | C14                                                                               | -0.17425   | O1                                                                                | -0.336702544 | H2                                                                                  | 0.050911   |
| N2                                                                                | -0.3847325  | C58                                                                               | -0.078663  | Zn1                                                                               | 0.863852789  | H3                                                                                  | -0.010385  |
| N5                                                                                | 0.588478    | C85                                                                               | 0.032752   |                                                                                   |              | H4                                                                                  | 0.083533   |
| O1                                                                                | -0.513472   | C82                                                                               | 0.0008315  |                                                                                   |              | H5                                                                                  | 0.152612   |
| Zn1                                                                               | 0.78809075  | H86                                                                               | 0.0677     |                                                                                   |              | N1                                                                                  | 0.549019   |
|                                                                                   |             | H10                                                                               | 0.08801225 |                                                                                   |              | N2                                                                                  | 0.637037   |
|                                                                                   |             | H17                                                                               | 0.100886   |                                                                                   |              | N3                                                                                  | -0.1615285 |
|                                                                                   |             | H15                                                                               | 0.02653    |                                                                                   |              | N4                                                                                  | -0.335407  |
|                                                                                   |             | H5                                                                                | 0.025733   |                                                                                   |              | N5                                                                                  | -0.142997  |
|                                                                                   |             | Cl7                                                                               | -0.153309  |                                                                                   |              | O1                                                                                  | -0.469039  |
|                                                                                   |             |                                                                                   |            |                                                                                   |              | O2                                                                                  | -0.417138  |
|                                                                                   |             |                                                                                   |            |                                                                                   |              | Zn1                                                                                 | 0.690143   |

Table 3: Atomic charges ( $e$ ) on  $Im - Zn - nIm$  fragments for ZIFs 79-82

| ZIF79                                                                             |              | ZIF80                                                                             |              | ZIF81                                                                              |             | ZIF82                                                                               |              |
|-----------------------------------------------------------------------------------|--------------|-----------------------------------------------------------------------------------|--------------|------------------------------------------------------------------------------------|-------------|-------------------------------------------------------------------------------------|--------------|
| 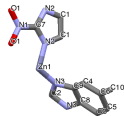 |              |  |              |  |             |  |              |
| C1                                                                                | 0.032906518  | C1                                                                                | 0.006586474  | Br1                                                                                | -0.05360366 | C1                                                                                  | 0.025438825  |
| C10                                                                               | -0.060596982 | C2                                                                                | -0.112881026 | C1                                                                                 | -0.00844216 | C2                                                                                  | 0.040290825  |
| C2                                                                                | 0.022409018  | C3                                                                                | 0.398487974  | C2                                                                                 | 0.08614634  | C3                                                                                  | -0.086898175 |
| C3                                                                                | -0.022760982 | C4                                                                                | 0.032632474  | C3                                                                                 | -0.15867266 | C4                                                                                  | 0.019024825  |
| C4                                                                                | -0.294764982 | C11                                                                               | -0.104059276 | C4                                                                                 | -0.18855966 | C5                                                                                  | 0.346642825  |
| C5                                                                                | -0.262450982 | H1                                                                                | 0.160282974  | C5                                                                                 | -0.09332866 | C6                                                                                  | 0.330535825  |
| C6                                                                                | 0.142721018  | H2                                                                                | 0.074763974  | C6                                                                                 | 0.03654734  | H1                                                                                  | 0.122317325  |
| C7                                                                                | 0.246174018  | N1                                                                                | 0.428308974  | C7                                                                                 | 0.33524434  | H2                                                                                  | 0.092760825  |
| C8                                                                                | -0.040575982 | N2                                                                                | -0.390102026 | C8                                                                                 | 0.09322034  | H3                                                                                  | 0.053276825  |
| C9                                                                                | 0.144435018  | N3                                                                                | -0.051962026 | C9                                                                                 | 0.14520034  | N1                                                                                  | 0.549978825  |
| H1                                                                                | 0.100044018  | O1                                                                                | -0.396090026 | H1                                                                                 | 0.07414009  | N2                                                                                  | -0.369172675 |
| H10                                                                               | 0.033027185  | Zn1                                                                               | 0.696742974  | H2                                                                                 | 0.12699134  | N3                                                                                  | -0.128532175 |
| H2                                                                                | 0.075918018  |                                                                                   |              | H3                                                                                 | 0.05665434  | N4                                                                                  | -0.498546175 |
| H3                                                                                | 0.009615018  |                                                                                   |              | H4                                                                                 | 0.12364134  | O1                                                                                  | -0.413424675 |
| H4                                                                                | 0.037820018  |                                                                                   |              | H5                                                                                 | 0.11818534  | Zn1                                                                                 | 0.679680325  |
| H5                                                                                | 0.164021018  |                                                                                   |              | N1                                                                                 | 0.72366234  |                                                                                     |              |
| N1                                                                                | 0.525830018  |                                                                                   |              | N2                                                                                 | -0.38018566 |                                                                                     |              |
| N2                                                                                | -0.315941482 |                                                                                   |              | N3                                                                                 | -0.23377816 |                                                                                     |              |
| N3                                                                                | -0.119002982 |                                                                                   |              | O1                                                                                 | -0.48827466 |                                                                                     |              |
| O1                                                                                | -0.423880482 |                                                                                   |              | Zn1                                                                                | 0.72175234  |                                                                                     |              |
| Zn1                                                                               | 0.664874018  |                                                                                   |              |                                                                                    |             |                                                                                     |              |

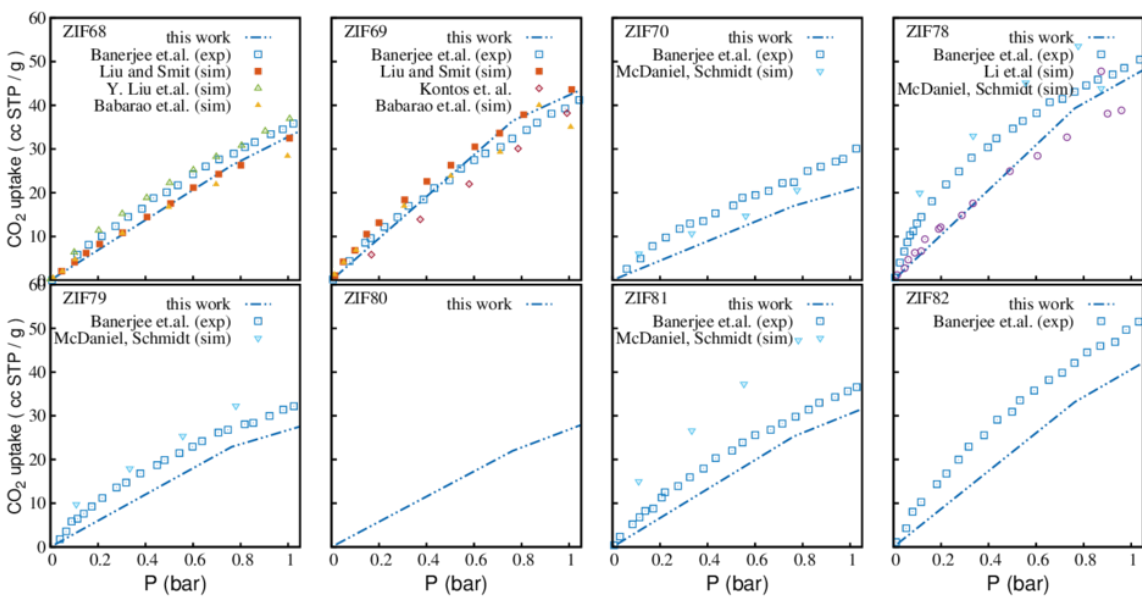

Figure 1:  $CO_2$  adsorption isotherms computed at 298K in this work, compared with a set of experimental and simulated isotherms provided in the literature. The citing articles are included in the reference list of the manuscript

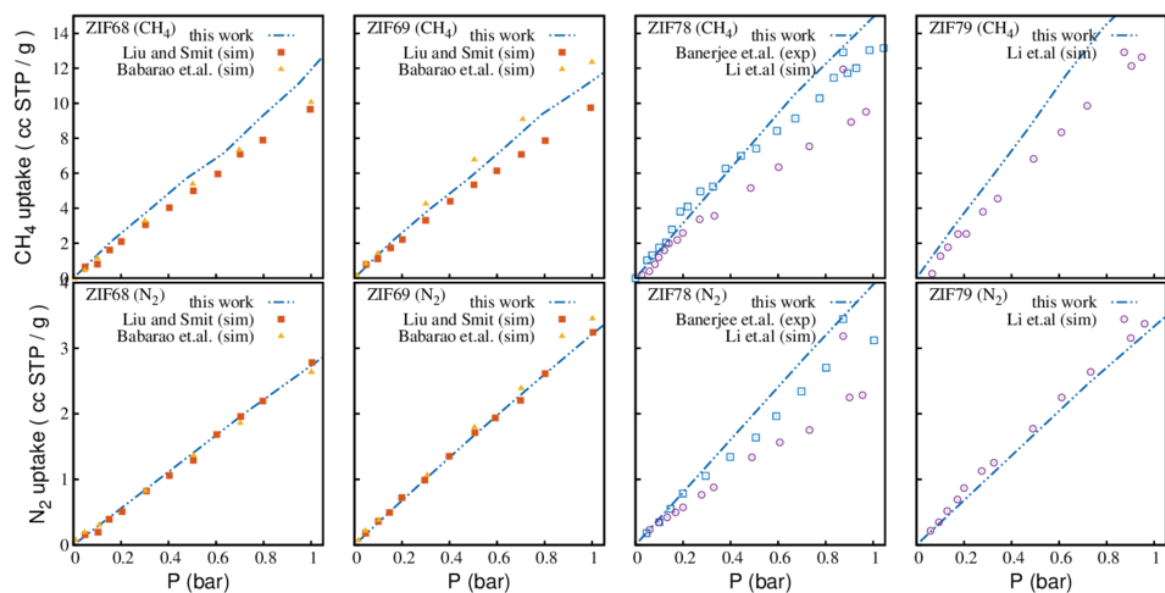

Figure 2:  $CH_4$  and  $N_2$  adsorption isotherms computed at 298K in this work, for ZIF68, ZIF69, ZIF78 and ZIF79, compared with a set of experimental and simulated isotherms provided in the literature. The citing articles are included in the reference list of the manuscript

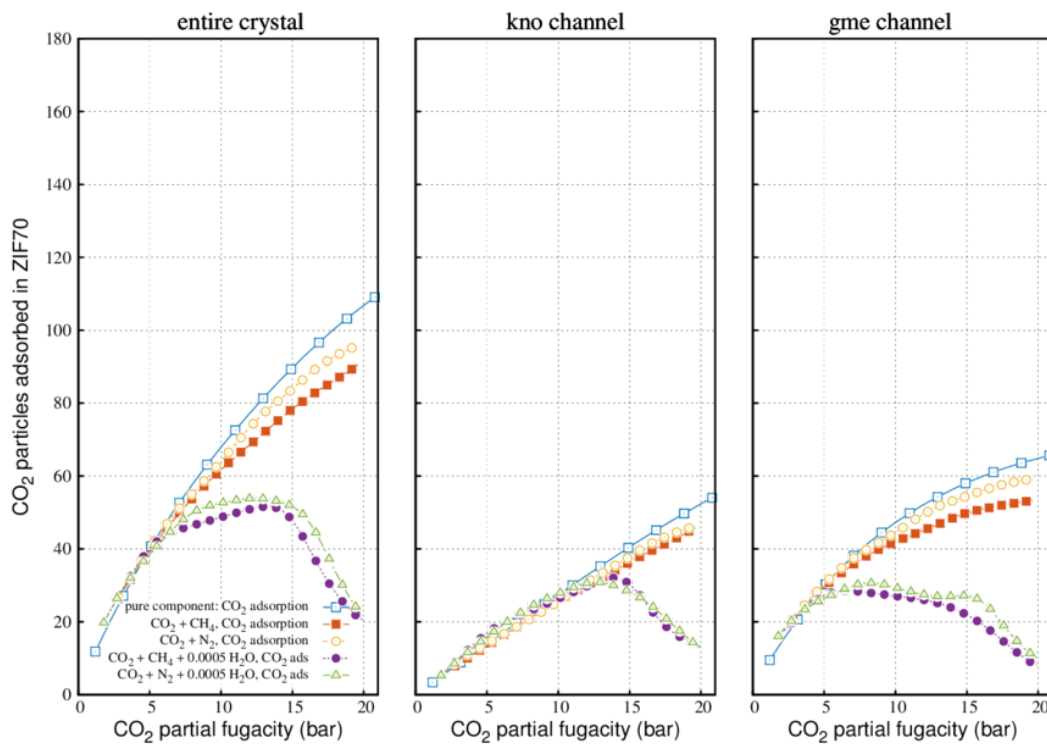

Figure 3: CO<sub>2</sub> adsorption in the unit cell, the *kno* and *gme* channels of ZIF70, for single and multicomponent systems.

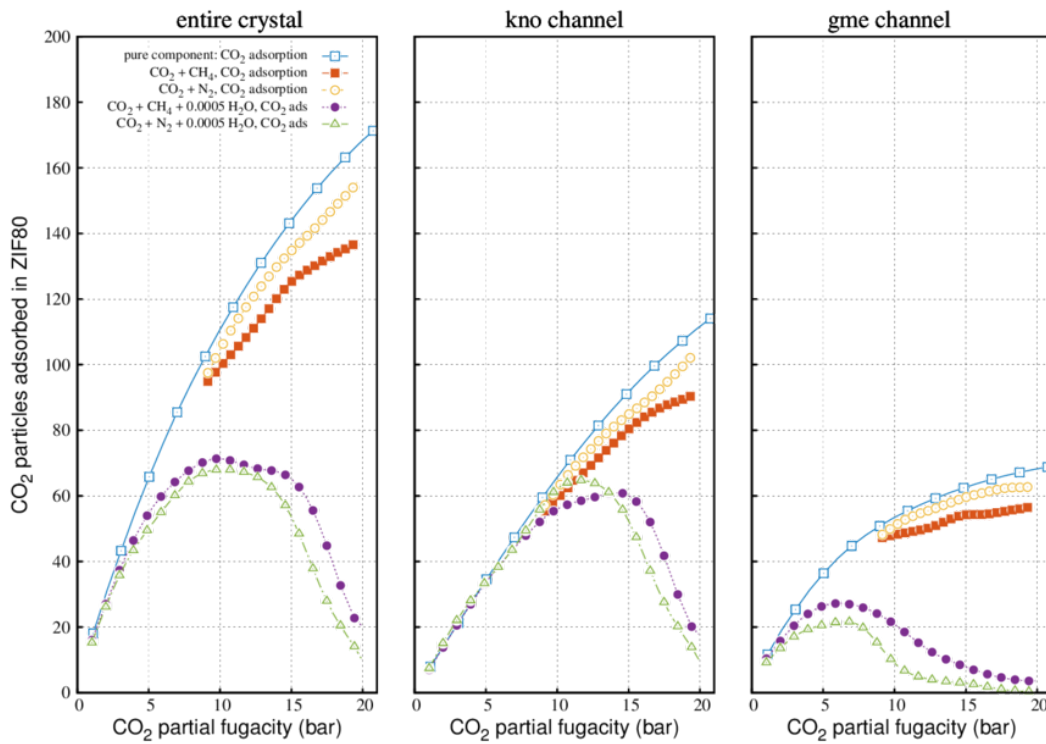

Figure 4: CO<sub>2</sub> adsorption in the unit cell, the *kno* and *gme* channels of ZIF80, for single and multicomponent systems.

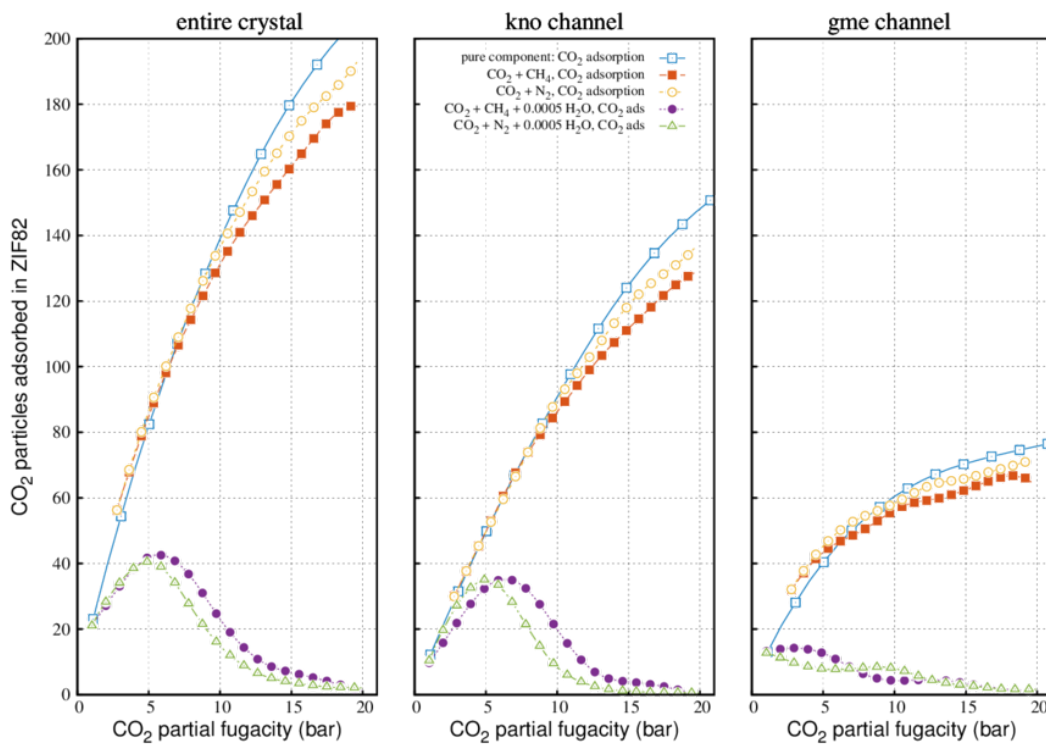

Figure 5: CO<sub>2</sub> adsorption in the unit cell, the *kno* and *gme* channels of ZIF82, for single and multicomponent systems.
